# Supplementary material for: Multi-Functional Materials Based on Cu-Doped TiO2 Ceramic Fibers with Enhanced Pseudocapacitive Performances and Their Dielectric Characteristics
Source: MDPI journal article supplement (doi:10.3390/polym14214739), 2022-11-04
Supplement: s1 [file s1]

# Multi-functional materials based on Cu doped TiO<sub>2</sub> ceramic fibers with enhanced pseudocapacitive performances and their dielectric characteristics

Petronela Pascariu\*, Mihaela Homocianu, Loredana Vacareanu, Mihai Asandulesa

*”Petru Poni” Institute of Macromolecular Chemistry, 41A Grigore Ghica Voda Alley, 700487, Iasi, Romania*

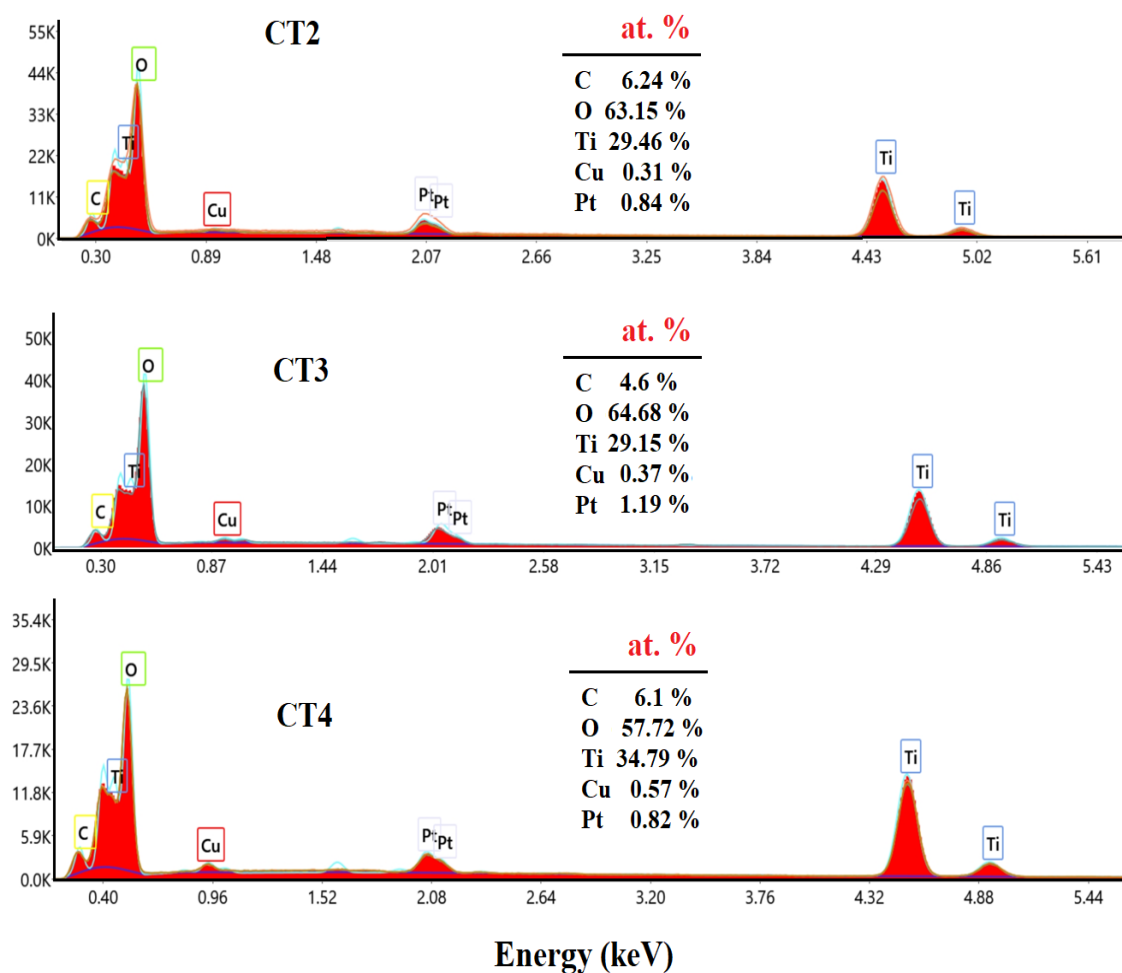

**Figure S1.** EDS spectra of 0.5% Cu (CT2), 1% Cu (CT3), 2% Cu (CT4) doped TiO<sub>2</sub> composites.

\*Corresponding author: [dorneanu.petronela@icmpp.ro](mailto:dorneanu.petronela@icmpp.ro); [pascariu\\_petronela@yahoo.com](mailto:pascariu_petronela@yahoo.com) (Petronela Pascariu);

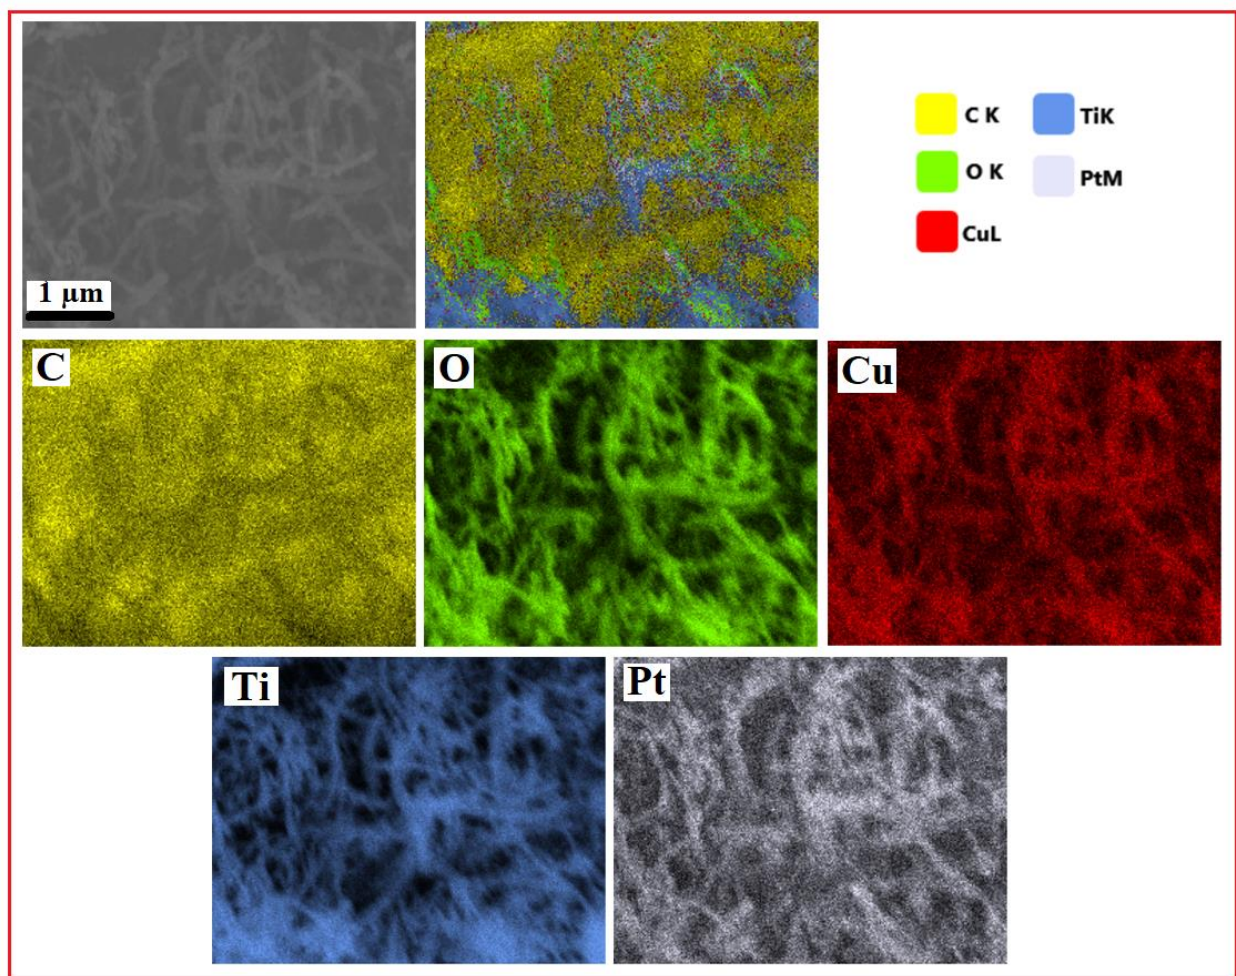

**Figure S2.** Elemental mapping images of 2% Cu- doped TiO<sub>2</sub> (CT4) composite.

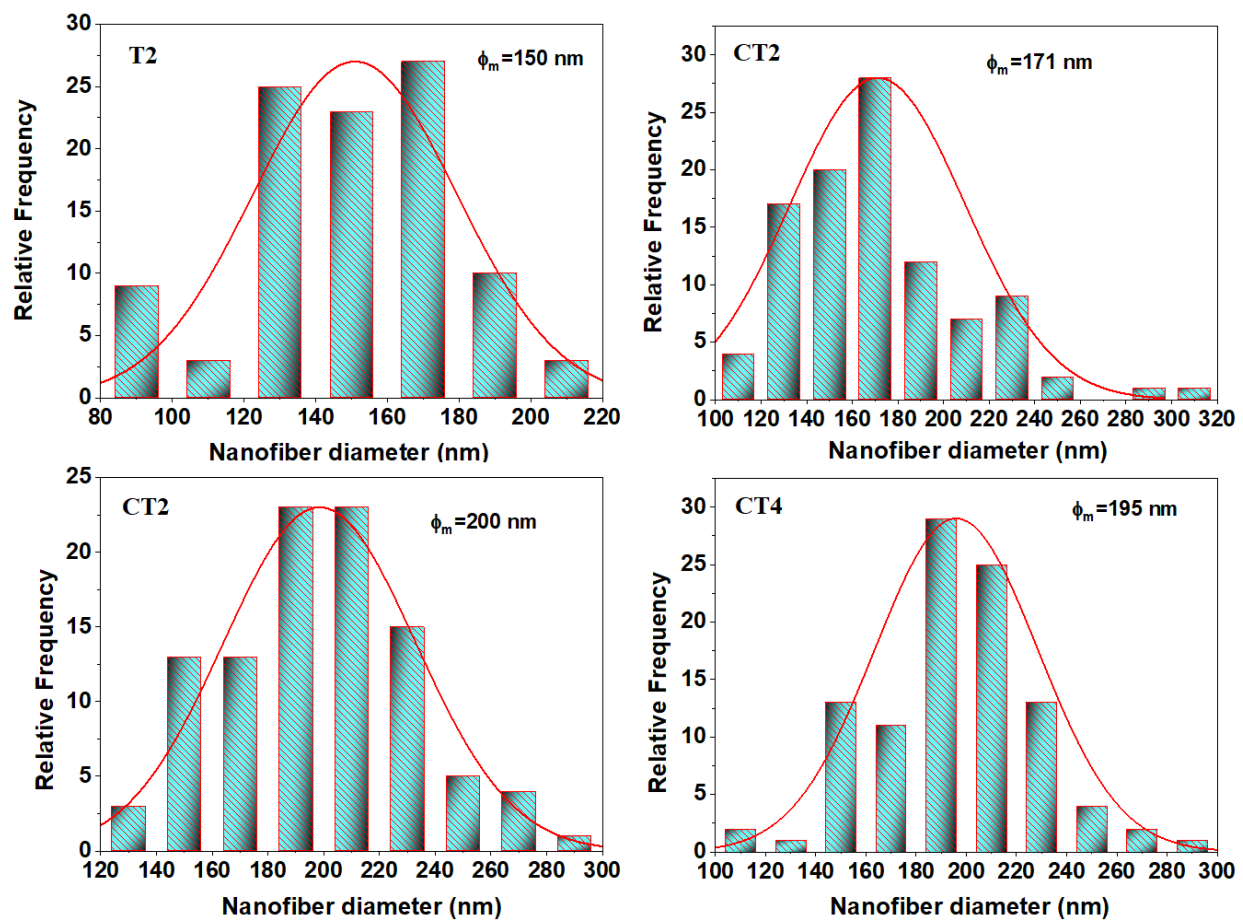

Figure S3. Histogram plots of average size diameter distribution for pure TiO<sub>2</sub> and 0.5% Cu (CT2), 1% Cu (CT3), 2% Cu (CT4) doped TiO<sub>2</sub> composites.
